# Supplementary material
Source: Springer Nature journal article supplement (https://www.springermedizin.de/resource/supplementary/12936_2008_820_MOESM1_ESM.pdf/9549000)

Potential sporogony period, residential  
vector transmission (16 days)

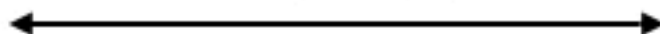

Latest vector transmission date  
(7 days pre-symptoms)

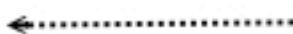

Potential sporogony period,  
hospital vector transmission (5 days)

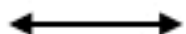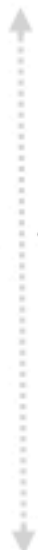

Vector-borne transmission

Direct/occupational transmission

Nosocomial exposure window (2,5 days)

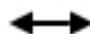

Period of possible direct/occupational  
inoculation (4-17 days pre-symptoms)

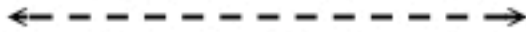

30 June  
Index patient  
arrives in Berlin

10-12 July  
Index  
patient  
on obst.  
ward

12-17 July  
Index patient  
on gynaecology  
ward

22 July  
First symptoms  
of malaria in  
secondary case

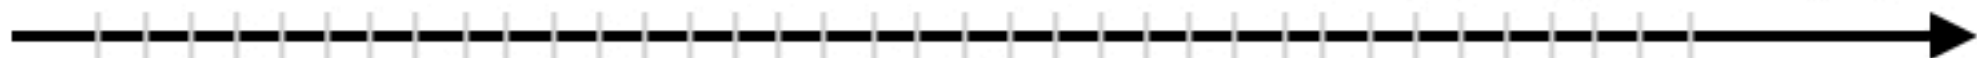

Supplement: MOESM1 [file 9549000]
